# Supplementary material for: Gestational Age-Related Associations between Early-Life Feeding Trajectories and Growth Outcomes at Term Equivalent Age in Very Preterm Infants
Source: MDPI journal article supplement (doi:10.3390/nu14051032), 2022-02-28
Supplement: s1 [file s1]

**Supplemental Materials.** The definitions of neonatal risks and morbidities and extrauterine growth restriction outcomes.

|                                                                   | Definition                                                                                                                                                                                                                                                                             |
|-------------------------------------------------------------------|----------------------------------------------------------------------------------------------------------------------------------------------------------------------------------------------------------------------------------------------------------------------------------------|
| Preeclampsia [1]                                                  | Pregnancy-induced hypertension (arterial blood pressure >140/90 mm Hg) during the second half of gestation.                                                                                                                                                                            |
| Small for gestational age (SGA) [2]                               | Birthweight below the 10th percentile for sex and gestational age, according to the Fenton growth chart.                                                                                                                                                                               |
| Respiratory distress syndrome (RDS) [3]                           | Preterm infants with the onset of progressive respiratory failure shortly after birth, in conjunction with a characteristic chest radiograph.                                                                                                                                          |
| Hemodynamically significant patent ductus arteriosus (hs-PDA) [4] | Based on clinical indices (a cardiovascular distress score $\geq 3$ ) and confirmed by echocardiographic investigation ( $LA/Ao \geq 1.3-1.4$ ).                                                                                                                                       |
| Necrotizing enterocolitis (NEC) [5]                               | According to a modified Bell staging classification:<br>Stage I NEC: suspected event; NEC $\geq$ stage II: definite on radiological findings with or without advanced symptoms.                                                                                                        |
| Intraventricular hemorrhage (IVH) [6]                             | IVH Classified into 4 grades (I–IV), according to the Papile classification system. Grades III and IV IVH were considered severe in this study.                                                                                                                                        |
| Cystic periventricular leukomalacia (cPVL) [7]                    | Periventricular echo lucent cystic lesions on ultrasonography or loss of periventricular white matter with an increased T2 signal, combined with ventriculomegaly and irregular margins on MRI.                                                                                        |
| Severe bronchopulmonary dysplasia (BPD) [8]                       | BPD is defined by the need for oxygen for $\geq 28$ days before 36 weeks' postmenstrual age. Infants with severe BPD were defined as requiring the use of a supplemental oxygen fraction greater than 30% and/or positive pressure respiratory support at 36 weeks' postmenstrual age. |
| Severe retinopathy of prematurity (ROP) [9]                       | Treatment-demanding or stage $\geq$ III ROP.                                                                                                                                                                                                                                           |
| Extrauterine growth restriction (EUGR) and severe EUGR [10-12]    | The z-scores for bodyweight and head circumference were derived from Fenton's postnatal growth charts. EUGR was determined by the changes of z-scores in bodyweight between birth and term equivalent age. A delta z less than 1 indicated EUGR, and less than 2 severe EUGR.          |

## Supplementary references

1. *Gestational Hypertension and Preeclampsia: ACOG Practice Bulletin Summary, Number 222.* Obstet Gynecol, 2020. **135**(6): p. 1492-1495.
2. Fenton, T.R. and J.H. Kim, *A systematic review and meta-analysis to revise the Fenton growth chart for preterm infants.* BMC Pediatrics, 2013. **13**.
3. Sweet, D.G., et al., *European Consensus Guidelines on the Management of Respiratory Distress Syndrome-2019 Update.* Neonatology, 2019. **115**(4): p. 432-450.
4. Gillam-Krakauer, M. and J. Reese, *Diagnosis and Management of Patent Ductus Arteriosus.* Neoreviews, 2018. **19**(7): p. e394-e402.
5. Neu, J. and W.A. Walker, *Necrotizing enterocolitis.* N Engl J Med, 2011. **364**(3): p. 255-64.
6. Valdez Sandoval, P., et al., *Intraventricular hemorrhage and posthemorrhagic hydrocephalus in preterm infants: diagnosis, classification, and treatment options.* Childs Nerv Syst, 2019. **35**(6): p. 917-927.
7. Deng, W., J. Pleasure, and D. Pleasure, *Progress in periventricular leukomalacia.* Arch Neurol, 2008. **65**(10): p. 1291-5.
8. Jobe, A.H. and E. Bancalari, *Bronchopulmonary dysplasia.* Am J Respir Crit Care Med, 2001. **163**(7): p. 1723-9.
9. American Academy of Pediatrics. Screening examination of premature infants for retinopathy of prematurity. Pediatrics. 2001;108(3):809-811.
10. Fenton TR, Cormack B, Goldberg D, Nasser R, Alshaikh B, Eliasziw M, et al. "Extrauterine growth restriction" and "postnatal growth failure" are misnomers for preterm infants. J Perinatol. 2020;40(5):704-714.
11. Kim YJ, Shin SH, Cho H, Shin SH, Kim SH, Song IG, et al. Extrauterine growth restriction in extremely preterm infants based on the Intergrowth-21st Project Preterm Postnatal Follow-up Study growth charts and the Fenton growth charts. Eur J Pediatr. 2020.
12. Pampanini V, Boiani A, De Marchis C, Giacomozzi C, Navas R, Agostino R, et al. Preterm infants with severe extrauterine growth retardation (EUGR) are at high risk of growth impairment during childhood. Eur J Pediatr. 2015;174(1):33-41.

**Supplemental Table S1.** Differences in demographics, respiratory/hemodynamic morbidities, and GI morbidities among the three different gestational age preterm groups.

| Preterm group                                    | GA 23–26wks<br>N =183 | GA 27–28wks<br>N = 215 | GA 29–30wks<br>N = 227 | p-Value |
|--------------------------------------------------|-----------------------|------------------------|------------------------|---------|
| <b>Demographics</b>                              |                       |                        |                        |         |
| Male, <i>n</i> (%)                               | 112 (61)              | 109 (51)               | 113 (50)               | 0.043   |
| Gestational age, mean (SD), weeks                | 24.9 (1.0)            | 27.5 (0.5)             | 29.5 (0.5)             | <0.001  |
| Birth weight, mean (SD), grams                   | 749 (153)             | 1035 (187)             | 1233 (216)             | <0.001  |
| Small for gestational age, <i>n</i> (%)          | 17 (9)                | 15 (7)                 | 27 (12)                | 0.209   |
| Multiple gestation, <i>n</i> (%)                 | 55 (30)               | 63 (29)                | 65 (29)                | 0.952   |
| Preeclampsia, <i>n</i> (%)                       | 29 (16)               | 40 (19)                | 66 (29)                | 0.002   |
| 5 min Apgar score <7, <i>n</i> (%)               | 70 (39)               | 37 (17)                | 20 (9)                 | <0.001  |
| <b>Feeding progression</b>                       |                       |                        |                        |         |
| Age at initial feeding, mean (SD), days          | 5.9 (6.4)             | 3.8 (3.6)              | 3.3 (2.2)              | <0.001  |
| Age at reaching full feeding, mean (SD), days    | 47 (19)               | 30 (13)                | 23 (9)                 | <0.001  |
| <b>Respiratory/hemodynamic morbidities</b>       |                       |                        |                        |         |
| RDS requiring surfactant therapy, <i>n</i> (%)   | 95 (52)               | 68 (32)                | 32 (14)                | <0.001  |
| Early-onset sepsis, <i>n</i> (%)                 | 10 (6)                | 16 (7)                 | 5 (2)                  | 0.037   |
| Late-onset sepsis, <i>n</i> (%)                  | 55 (30)               | 12 (6)                 | 12 (5)                 | <0.001  |
| Hypotension requiring vasopressors, <i>n</i> (%) | 142 (78)              | 88 (41)                | 66 (29)                | <0.001  |
| Severe IVH (≥III), <i>n</i> (%)                  | 15 (8)                | 7 (3)                  | 4 (2)                  | 0.004   |
| cPVL, <i>n</i> (%)                               | 14 (8)                | 8 (4)                  | 5 (2)                  | 0.023   |
| hs-PDA requiring surgery, <i>n</i> (%)           | 62 (34)               | 13 (6)                 | 3 (1)                  | <0.001  |
| Duration of IMV, mean (SD), days                 | 13 (14)               | 2.8 (7.4)              | 0.8 (2.5)              | <0.001  |
| Postnatal steroid, <i>n</i> (%)                  | 51 (28)               | 13 (6)                 | 1 (0.4)                | <0.001  |
| <b>GI morbidities</b>                            |                       |                        |                        |         |
| NEC stage 1, <i>n</i> (%)                        | 22 (12)               | 24 (11)                | 25 (11)                | 0.944   |
| Severe NEC (≥ stage II), <i>n</i> (%)            | 20 (11)               | 13 (6)                 | 8 (4)                  | 0.010   |
| Non-NEC events requiring surgery, <i>n</i> (%)   | 19 (10.4)             | 8 (3.7)                | 3 (1.3)                | <0.001  |

cPVL, cystic periventricular leukomalacia; GI, gastrointestinal; hs-PDA, hemodynamically significant patent ductus arteriosus; IVH, intraventricular hemorrhage; IMV, invasive mechanical ventilation; NEC, necrotizing enterocolitis; non-NEC GI events requiring surgery included meconium ileus, spontaneous intestine perforation, volvulus, and intestine adhesions; RDS, respiratory distress syndrome; full feeding defined as the feeding volume reached ≥120cc/kg/day.

**Supplemental Table S2.** Univariate logistic regression models of the demographics and morbidities related to the adverse feeding pattern in infants in each gestational age preterm group.

|                                            | GA 23–26 weeks    |         | GA 27–28 weeks     |         | GA 29–30 weeks      |         |
|--------------------------------------------|-------------------|---------|--------------------|---------|---------------------|---------|
|                                            | OR (95% CI)       | p-value | OR (95% CI)        | p-value | OR (95% CI)         | p-value |
| <b>Demographics</b>                        |                   |         |                    |         |                     |         |
| Gestational age                            | 0.64 (0.48–0.86)  | 0.003   | 0.45 (0.23–0.91)   | 0.025   | 0.52 (0.26–1.04)    | 0.064   |
| Small for gestational age                  | 1.21 (0.44–3.29)  | 0.708   | 1.54 (0.47–5.10)   | 0.479   | 0.82 (0.27–2.52)    | 0.729   |
| Male                                       | 0.87 (0.48–1.58)  | 0.652   | 1.40 (0.71–2.76)   | 0.336   | 0.74 (0.37–1.48)    | 0.397   |
| Multiple gestation                         | 0.75 (0.40–1.42)  | 0.376   | 2.12 (1.05–4.26)   | 0.036   | 0.40 (0.16–1.00)    | 0.050   |
| Preeclampsia                               | 1.16 (0.52–2.57)  | 0.715   | 1.03 (0.44–2.43)   | 0.947   | 2.50 (1.23–5.08)    | 0.011   |
| 5 min Apgar score <7                       | 1.09 (0.60–1.99)  | 0.768   | 3.24 (1.49–7.05)   | 0.003   | 0.51 (0.11–2.30)    | 0.381   |
| <b>Respiratory/hemodynamic morbidities</b> |                   |         |                    |         |                     |         |
| RDS requiring surfactant therapy           | 1.23 (0.68–2.20)  | 0.494   | 1.09 (0.53–2.24)   | 0.809   | 1.43 (0.57–3.58)    | 0.449   |
| Early-onset sepsis                         | 1.06 (0.30–3.80)  | 0.928   | 0.56 (0.12–2.58)   | 0.461   | 1.21 (0.13–11.13)   | 0.866   |
| Late-onset sepsis                          | 4.33 (2.17–8.67)  | <0.001  | 6.68 (2.00–22.27)  | 0.002   | 1.66 (0.43–6.42)    | 0.465   |
| Hypotension requiring vasopressors         | 2.36 (1.12–4.95)  | 0.023   | 4.27 (2.07–8.83)   | <0.001  | 0.95 (0.44–2.04)    | 0.895   |
| Severe IVH                                 | 1.65 (0.56–4.85)  | 0.361   | 1.67 (0.31–8.92)   | 0.548   | ---                 | ---     |
| cPVL                                       | 1.76 (0.55–5.60)  | 0.339   | 4.42 (1.06–18.48)  | 0.042   | 1.21 (0.13–11.13)   | 0.866   |
| hs-PDA requiring surgery                   | 2.09 (1.11–3.91)  | 0.022   | 5.53 (1.75–17.47)  | 0.004   | ---                 | ---     |
| Postnatal steroid                          | 0.97 (0.50–1.85)  | 0.918   | 1.25 (0.33–4.74)   | 0.747   | ---                 | ---     |
| Duration of IMV                            | 1.04 (1.02–1.07)  | <0.001  | 1.12 (1.05–1.19)   | 0.001   | 1.14 (1.02–1.28)    | 0.021   |
| <b>GI morbidities</b>                      |                   |         |                    |         |                     |         |
| NEC stage I                                | 1.33 (0.52–3.39)  | 0.546   | 2.85 (1.15–7.07)   | 0.024   | 28.82 (10.31–80.51) | <0.001  |
| Severe NEC                                 | 2.74 (1.00–7.50)  | 0.049   | 11.45 (3.33–39.41) | <0.001  | 40.91 (4.87–343.74) | <0.001  |
| Non-NEC events requiring surgery           | 4.57 (1.45–14.37) | 0.001   | 3.42 (4.08–286.8)  | 0.001   | 2.45 (0.22–27.68)   | 0.470   |

GA, gestational age; RDS, respiratory distress syndrome; cPVL, cystic periventricular leukomalacia; PDA, patent ductus arteriosus; NEC, necrotizing enterocolitis; GI, gastrointestinal; IMV, invasive mechanical ventilation; OR, odds ratios; CI, confidence interval.
